# Supplementary material for: Host Fatty Acid Utilization by Staphylococcus aureus at the Infection Site
Source: PubMed Central journal article supplement (PMC7240157; doi:10.1128/mbio.00920-20), 2020-05-19
Supplement: mBio.00920-20-sf002.pdf [file mBio.00920-20-sf002.pdf]

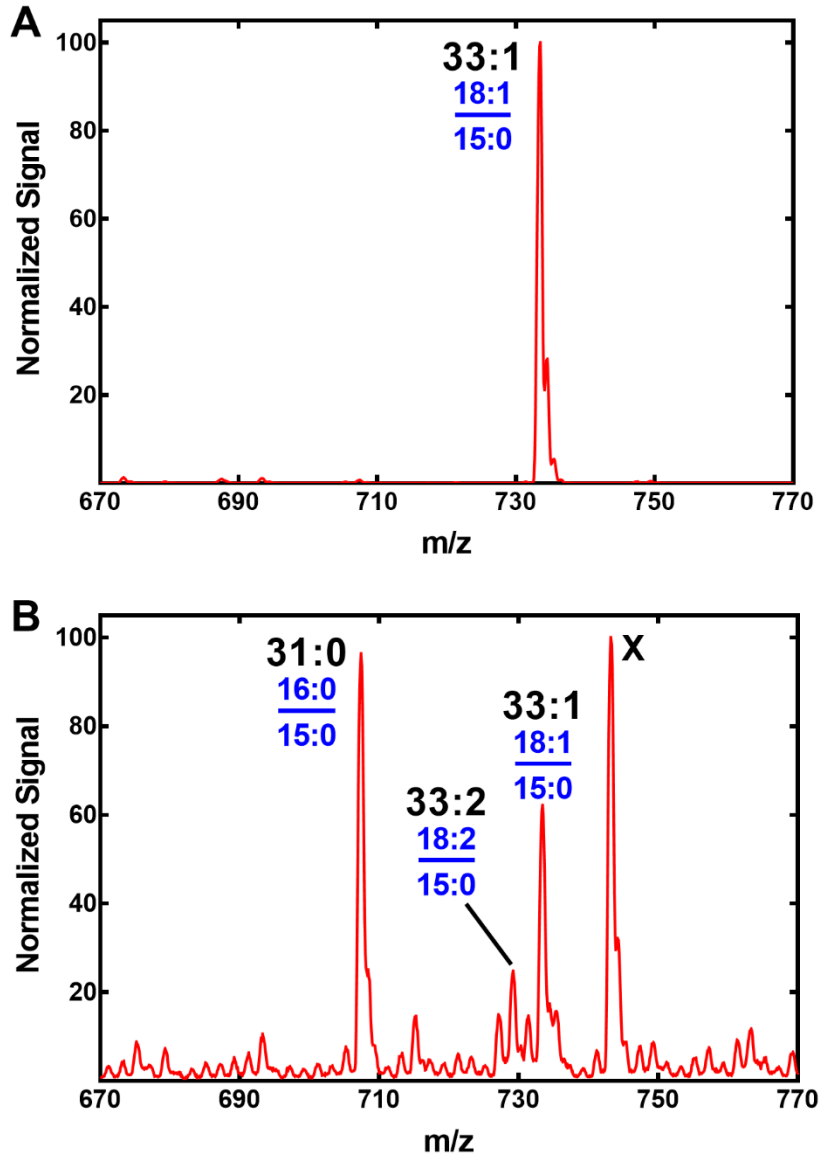

**FIG S2** Host FA utilization by strain PDJ70 ( $\Delta p/sX$ ). The identities of the FA in the 1- and 2-positions (blue) are shown for each molecular species (black). (A) A representative mass spectrum of the PG molecular species of strain PDJ70 ( $\Delta p/sX$ ) used to inoculate the thigh grown in tryptone broth supplemented with 500  $\mu$ M 18:1. (B) A representative mass spectrum of PG molecular species from strain PDJ70 ( $\Delta p/sX$ ) recovered from the thigh infection site. The PG fraction was isolated, and the mass spectrum of the sample was generated using a  $m/z = 241$  scan to detect PG molecular species containing 15:0 (See Fig. S1). The peak labeled “X” is not a PG molecular species.
