# Supplementary material for: Host Fatty Acid Utilization by Staphylococcus aureus at the Infection Site
Source: PubMed Central journal article supplement (PMC7240157; doi:10.1128/mbio.00920-20), 2020-05-19
Supplement: mBio.00920-20-st001.pdf [file mBio.00920-20-st001.pdf]

**Table S1** Quantification of the PG molecular species distribution found in the PG of strains grown in the thigh model. Multiple spectra were obtained using the methods outlined in Fig. 3, the percentage of each peak was calculated and the percent distribution determined.

| PG Species | % Total PG (Mean $\pm$ SD) |                   |                              |                                             |                                |                                |
|------------|----------------------------|-------------------|------------------------------|---------------------------------------------|--------------------------------|--------------------------------|
|            | AH1263 (WT) Luria broth    | AH1263 (WT) Thigh | JLB2 ( $\Delta fakA$ ) Thigh | JLB31 ( $\Delta fakB1 \Delta fakB2$ ) Thigh | JLB27 ( $\Delta fakB1$ ) Thigh | JLB30 ( $\Delta fakB2$ ) Thigh |
| 30:0-PG    | 21.71 $\pm$ 2.40           | 3.16 $\pm$ 0.61   | 15.24 $\pm$ 1.58             | 13.60 $\pm$ 1.31                            | 3.11 $\pm$ 0.51                | 2.97 $\pm$ 0.18                |
| 31:0-PG    | 0.64 $\pm$ 0.11            | 19.29 $\pm$ 1.44  | 13.55 $\pm$ 0.34             | 11.90 $\pm$ 0.95                            | 7.22 $\pm$ 0.80                | 25.66 $\pm$ 1.92               |
| 32:0-PG    | 55.29 $\pm$ 2.52           | 4.91 $\pm$ 0.64   | 19.77 $\pm$ 2.00             | 21.11 $\pm$ 2.06                            | 5.91 $\pm$ 1.48                | 5.54 $\pm$ 0.32                |
| 33:1-PG    | ND <sup>a</sup>            | 21.58 $\pm$ 1.26  | ND                           | ND                                          | 26.78 $\pm$ 0.92               | ND                             |
| 33:0-PG    | 7.70 $\pm$ 0.66            | 23.46 $\pm$ 0.85  | 24.32 $\pm$ 0.97             | 24.52 $\pm$ 1.32                            | 15.19 $\pm$ 1.10               | 37.02 $\pm$ 1.41               |
| 34:0-PG    | 11.58 $\pm$ 0.90           | 3.86 $\pm$ 1.32   | 9.95 $\pm$ 2.75              | 13.25 $\pm$ 2.43                            | 8.36 $\pm$ 0.93                | 3.60 $\pm$ 0.36                |
| 35:1-PG    | ND                         | 9.33 $\pm$ 0.91   | ND                           | ND                                          | 21.76 $\pm$ 1.06               | ND                             |
| 35:0-PG    | 3.08 $\pm$ 0.43            | 14.41 $\pm$ 0.98  | 17.16 $\pm$ 2.49             | 15.63 $\pm$ .91                             | 11.67 $\pm$ 0.95               | 26.64 $\pm$ 1.27               |

<sup>a</sup>ND means not detected
