# Supplementary material for: Host Fatty Acid Utilization by Staphylococcus aureus at the Infection Site
Source: PubMed Central journal article supplement (PMC7240157; doi:10.1128/mbio.00920-20), 2020-05-19
Supplement: mBio.00920-20-st002.pdf [file mBio.00920-20-st002.pdf]

**Table S2** Bacterial strains and primers.

| <b>Strains</b> | <b>Relevant Genotype</b>                  | <b>Source</b> |
|----------------|-------------------------------------------|---------------|
| AH1263         | USA300-0114                               | (51)          |
| JLB2           | $\Delta fakA$                             | (8)           |
| JLB27          | $\Delta fakB1::\Phi N\Sigma$              | (8)           |
| JLB30          | $\Delta fakB2$                            | (8)           |
| JLB31          | $\Delta fakB1::\Phi N\Sigma \Delta fakB2$ | (8)           |
| PDJ69          | $\Delta accD$                             | This study    |
| PDJ70          | $\Delta plsX$                             | This study    |
